# Supplementary material
Source: Research Square preprint supplement (doi:10.21203/rs.3.rs-9434896/v1)
Supplement: Supplementary file 1 [file af4fedf7c44568eaec7c5a16.docx]

**Supplementary Table 1. Cause-specific hazard ratios for incident gynecological disorders between non-SLD and cryptogenic SLD.**

| **Variable** | **Event, n** | **PY** | **aHR** | ***P* value** |
| --- | --- | --- | --- | --- |
| Infertility |  |  |  |  |
| Non-SLD (n=301,668) | 38,591 | 1,976,604 | 1.00 (reference) |  |
| Cryptogenic SLD (n=76) | 6 | 507 | 0.89 (0.40-1.99) | 0.781 |
| Polycystic ovarian syndrome |  |  |  |  |
| Non-SLD (n=301,668) | 7,746 | 2,107,227 | 1.00 (reference) |  |
| Cryptogenic SLD (n=76) | 1 | 530 | N/A |  |
| Endometriosis |  |  |  |  |
| Non-SLD (n=301,668) | 7,728 | 2,108,364 | 1.00 (reference) |  |
| Cryptogenic SLD (n=76) | 0 | 533 | N/A |  |
| Adenomyosis |  |  |  |  |
| Non-SLD (n=301,668) | 11,450 | 2,104,404 | 1.00 (reference) |  |
| Cryptogenic SLD (n=76) | 5 | 523 | 1.47 (0.61-3.53) | 0.391 |
| Premature ovarian insufficiency |  |  |  |  |
| Non-SLD (n=301,668) | 1,868 | 2,129,922 | 1.00 (reference) |  |
| Cryptogenic SLD (n=76) | 0 | 533 | N/A |  |
| Endometrial hyperplasia |  |  |  |  |
| Non-SLD (n=301,668) | 3,083 | 2,126,045 | 1.00 (reference) |  |
| Cryptogenic SLD (n=76) | 0 | 533 | N/A |  |

Data are adjusted subdistribution hazard ratios (95% CIs) after adjustment for age, household income, Charlson comorbidity index, body mass index, cigarette smoking, moderate-to-vigorous physical activity, and gravidity.

Acronyms: SLD, steatotic liver disease; PY, person-year; aHR, adjusted hazard ratio.

**Supplementary Table 2. SHRs for incident gynecological disorders across the subcategories of SLD.**

| **Variable** | **Non-SLD** | **MASLD** | **MetALD** | **ALD** | **Cryptogenic SLD** |
| --- | --- | --- | --- | --- | --- |
| Infertility | 1.00 (reference) | 1.10 (1.04-1.17)** | 1.31 (1.17-1.47)*** | 1.31 (1.07-1.61)** | 0.88 (0.39-1.96) |
| Polycystic ovarian syndrome | 1.00 (reference) | 2.05 (1.85-2.27)*** | 2.28 (1.92-2.71)*** | 2.09 (1.55-2.81)*** | 0.75 (0.11-5.10) |
| Endometriosis | 1.00 (reference) | 1.12 (0.98-1.27) | 0.86 (0.63-1.17) | 1.20 (0.72-2.00) | N/A |
| Adenomyosis | 1.00 (reference) | 1.13 (1.04-1.24)** | 1.31 (1.12-1.55)** | 1.67 (1.27-2.20)*** | 1.46 (0.61-3.46) |
| Premature ovarian insufficiency | 1.00 (reference) | 1.48 (1.16-1.89)** | 1.82 (1.15-2.89)* | 0.99 (0.32-3.11) | N/A |
| Endometrial hyperplasia | 1.00 (reference) | 1.29 (1.11-1.49)*** | 1.07 (0.80-1.43) | 1.62 (1.02-2.56)* | N/A |

Data are adjusted subdistribution hazard ratios (95% CIs) after adjustment for age, household income, Charlson comorbidity index, body mass index, cigarette smoking, moderate-to-vigorous physical activity, and gravidity. Overall death was considered as a competing risk event.

Acronyms: SHR, subdistribution hazard ratio; SLD, steatotic liver disease; MASLD, metabolic dysfunction-associated steatotic liver disease; MetALD, metabolic alcohol-related liver disease; ALD, alcohol-related liver disease.

**P*<0.05.

***P*<0.01.

****P*<0.001.

**Supplementary Table 3. Variance inflation factor for variables used in this study.**

| **Variable** | Variance inflation factor |
| --- | --- |
| Age | 1.04 |
| Household income | 1.04 |
| Charlson comorbidity index | 1.00 |
| Body mass index | 2.39 |
| Cigarette smoking | 1.03 |
| MVPA | 1.02 |
| Gravidity | 1.01 |

Acronyms: MVPA, moderate-to-vigorous physical activity.

**P*<0.05.

***P*<0.01.

****P*<0.001.

**Supplementary Table 4. Subgroup analyses on the risk of incident infertility across the subcategories of SLD.**

| **Variable** | **Non-SLD** | **MASLD** | **MetALD** | **ALD** | ***P* for interaction** |
| --- | --- | --- | --- | --- | --- |
| Age, years |  |  |  |  | 0.057 |
| 18-34 | 1.00 (reference) | 1.11 (1.03-1.19)** | 1.35 (1.18-1.54)*** | 1.33 (1.06-1.68)* |  |
| ≥35 | 1.00 (reference) | 1.10 (0.98-1.24) | 0.99 (0.77-1.28) | 1.08 (0.65-1.77) |  |
| Household income |  |  |  |  | <0.001 |
| Lower | 1.00 (reference) | 1.04 (0.96-1.13) | 1.26 (1.06-1.48)** | 1.40 (1.05-1.87)* |  |
| Upper | 1.00 (reference) | 1.16 (1.06-1.27)** | 1.36 (1.15-1.59)*** | 1.25 (0.93-1.67) |  |
| Cigarette smoking |  |  |  |  | <0.001 |
| Never | 1.00 (reference) | 1.08 (1.01-1.15)* | 1.21 (1.05-1.40)* | 1.23 (0.93-1.63) |  |
| Past or Current | 1.00 (reference) | 1.26 (1.04-1.53)* | 1.40 (1.13-1.74)** | 1.39 (1.00-1.92)* |  |
| Charlson comorbidity index |  |  |  |  | 0.620 |
| 0 | 1.00 (reference) | 1.05 (0.97-1.14) | 1.31 (1.13-1.52)*** | 1.42 (1.09-1.84)** |  |
| ≥1 | 1.00 (reference) | 1.17 (1.07-1.29)*** | 1.31 (1.09-1.57)** | 1.19 (0.84-1.67) |  |
| MVPA |  |  |  |  | 0.647 |
| No | 1.00 (reference) | 1.12 (1.03-1.21)** | 1.38 (1.18-1.62)*** | 1.42 (1.08-1.86)* |  |
| Yes | 1.00 (reference) | 1.09 (0.99-1.19) | 1.24 (1.05-1.46)* | 1.19 (0.86-1.65) |  |
| Number of pregnant |  |  |  |  | <0.001 |
| 0 | 1.00 (reference) | 1.09 (1.02-1.16)** | 1.31 (1.16-1.47)*** | 1.34 (1.09-1.65)** |  |
| ≥1 | 1.00 (reference) | 1.01 (0.82-1.25) | 1.48 (0.83-2.63) | 0.99 (0.24-4.02) |  |

Data are adjusted hazard ratios (95% CIs) after adjustment for age, household income, Charlson comorbidity index, body mass index, cigarette smoking, moderate-to-vigorous physical activity, and gravidity.

Acronyms: SLD, steatotic liver disease; MASLD, metabolic dysfunction-associated steatotic liver disease; MetALD, metabolic alcohol-related liver disease; ALD, alcohol-related liver disease; MVPA, moderate-to-vigorous physical activity.

**P*<0.05.

***P*<0.01.

****P*<0.001.

**Supplementary Table 5. Sensitivity analyses on the risk of incident infertility across the subcategories of SLD.**

| **Variable** | **Non-SLD** | **MASLD** | **MetALD** | **ALD** |
| --- | --- | --- | --- | --- |
| Infertility |  |  |  |  |
| 1-year latent period | 1.00 (reference) | 1.08 (1.01-1.15)* | 1.31 (1.15-1.49)*** | 1.31 (1.04-1.65)* |
| 2-year latent period | 1.00 (reference) | 1.03 (0.96-1.12) | 1.33 (1.15-1.53)*** | 1.33 (1.03-1.71)* |
| 3-year latent period | 1.00 (reference) | 0.98 (0.89-1.07) | 1.20 (1.01-1.42)* | 1.21 (0.90-1.63) |
| Polycystic ovarian syndrome |  |  |  |  |
| 1-year latent period | 1.00 (reference) | 2.02 (1.81-2.25)*** | 2.26 (1.89-2.70)*** | 2.00 (1.46-2.74)*** |
| 2-year latent period | 1.00 (reference) | 2.02 (1.80-2.26)*** | 2.19 (1.81-2.65)*** | 2.07 (1.50-2.85)*** |
| 3-year latent period | 1.00 (reference) | 1.99 (1.76-2.25)*** | 1.98 (1.61-2.44)*** | 1.94 (1.37-2.74)*** |
| Endometriosis |  |  |  |  |
| 1-year latent period | 1.00 (reference) | 1.12 (0.98-1.28) | 0.87 (0.63-1.19) | 1.24 (0.74-2.08) |
| 2-year latent period | 1.00 (reference) | 1.14 (0.99-1.30) | 0.90 (0.65-1.24) | 1.29 (0.77-2.16) |
| 3-year latent period | 1.00 (reference) | 1.14 (0.99-1.31) | 0.84 (0.60-1.18) | 1.25 (0.73-2.13) |
| Adenomyosis |  |  |  |  |
| 1-year latent period | 1.00 (reference) | 1.13 (1.03-1.23)** | 1.33 (1.13-1.57)*** | 1.66 (1.25-2.19)*** |
| 2-year latent period | 1.00 (reference) | 1.11 (1.02-1.22)* | 1.32 (1.12-1.56)*** | 1.55 (1.16-2.08)** |
| 3-year latent period | 1.00 (reference) | 1.11 (1.01-1.22)* | 1.34 (1.13-1.58)*** | 1.53 (1.14-2.06)** |
| Premature ovarian insufficiency |  |  |  |  |
| 1-year latent period | 1.00 (reference) | 1.43 (1.10-1.85)** | 1.86 (1.16-2.98)** | 0.71 (0.18-2.87) |
| 2-year latent period | 1.00 (reference) | 1.49 (1.13-1.95)** | 2.08 (1.29-3.34)** | 0.79 (0.20-3.21) |
| 3-year latent period | 1.00 (reference) | 1.35 (1.00-1.82)* | 2.13 (1.29-3.52)** | 0.91 (0.22-3.71) |
| Endometrial hyperplasia |  |  |  |  |
| 1-year latent period | 1.00 (reference) | 1.25 (1.07-1.45)** | 0.98 (0.72-1.33) | 1.39 (0.85-2.28) |
| 2-year latent period | 1.00 (reference) | 1.25 (1.07-1.45)** | 0.92 (0.67-1.26) | 1.43 (0.87-2.34) |
| 3-year latent period | 1.00 (reference) | 1.24 (1.06-1.45)** | 0.85 (0.61-1.19) | 1.32 (0.78-2.24) |

Data are adjusted hazard ratios (95% CIs) after adjustment for age, household income, Charlson comorbidity index, body mass index, cigarette smoking, moderate-to-vigorous physical activity, and gravidity.

Acronyms: SLD, steatotic liver disease; MASLD, metabolic dysfunction-associated steatotic liver disease; MetALD, metabolic alcohol-related liver disease; ALD, alcohol-related liver disease.

**P*<0.05.

***P*<0.01.

****P*<0.001.

**Supplementary Table 6. Adjusted HRs for incident gynecological disorders across the subcategories of SLD after adjustment for alcohol consumption.**

| **Variable** | **Non-SLD** | **MASLD** | **MetALD** | **ALD** |
| --- | --- | --- | --- | --- |
| Infertility | 1.00 (reference) | 1.10 (1.03-1.17)** | 1.38 (1.22-1.56)*** | 1.64 (1.29-2.08)*** |
| Polycystic ovarian syndrome | 1.00 (reference) | 2.05 (1.85-2.28)*** | 2.33 (1.92-2.82)*** | 1.95 (1.37-2.80)*** |
| Endometriosis | 1.00 (reference) | 1.09 (0.96-1.24) | 1.13 (0.81-1.58) | 1.62 (0.89-2.95) |
| Adenomyosis | 1.00 (reference) | 1.15 (1.05-1.25)** | 1.19 (0.99-1.43) | 1.40 (0.99-1.98) |
| Premature ovarian insufficiency | 1.00 (reference) | 1.49 (1.16-1.91)** | 1.59 (0.97-2.62) | 1.14 (0.32-4.11) |
| Endometrial hyperplasia | 1.00 (reference) | 1.29 (1.11-1.50)*** | 1.04 (0.74-1.46) | 1.49 (0.81-2.75) |

Data are adjusted HR (95% CIs) after adjustment for age, household income, Charlson comorbidity index, body mass index, cigarette smoking, moderate-to-vigorous physical activity, gravidity, and alcohol consumption.

Acronyms: HR, hazard ratio; SLD, steatotic liver disease; MASLD, metabolic dysfunction-associated steatotic liver disease; MetALD, metabolic alcohol-related liver disease; ALD, alcohol-related liver disease; CI, confidence interval.

**P*<0.05.

***P*<0.01.

****P*<0.001.
